# Supplementary material for: Combined immunodeficiency and Epstein-Barr virus–induced B cell malignancy in humans with inherited CD70 deficiency
Source: PubMed Central journal article supplement — J Exp Med. 2017 Jan;214(1):91–106. doi: 10.1084/jem.20160849 (PMC5206499; doi:10.1084/jem.20160849), 2017-01
Supplement: JEM_20160849_sm.pdf [file JEM_20160849_sm.pdf]

SUPPLEMENTAL MATERIAL

Abolhassani et al., <https://doi.org/10.1084/jem.20160849>

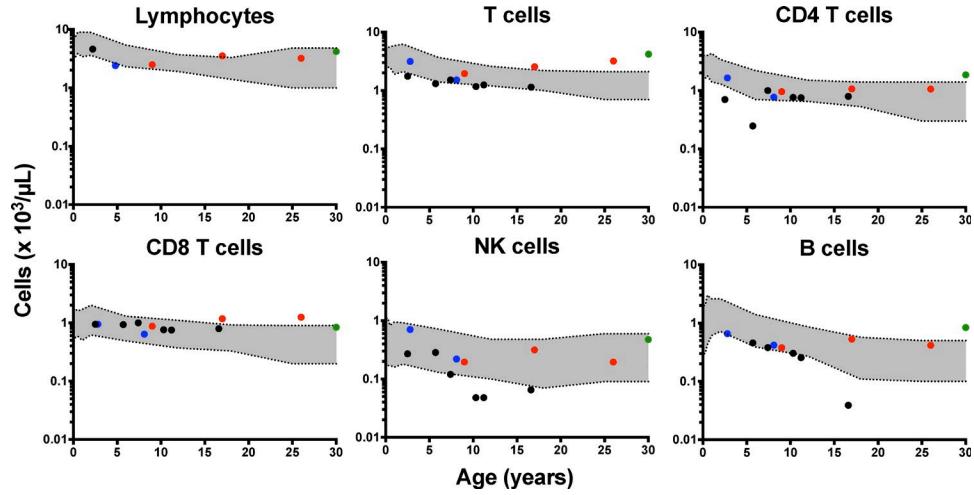

Figure S1. Enumeration of peripheral blood lymphocyte subsets in the patients. Solid circles indicate values graphed according to age of the patients. Red, P1; green, P2; black, P3; red, P4. Each dot represents one data point taken at that particular time. Gray shading indicates the 10–90th percentile for normal ranges according to age (Shearer et al., 2003).

Table S1. Complementary immunological and virological investigations in patients from family 1

| Parameter                                          | P1                       | P2           | Reference range  |
|----------------------------------------------------|--------------------------|--------------|------------------|
| C3 (IU/ml)                                         | 112                      | NA           | 70–170           |
| C4 (IU/ml)                                         | 24                       | NA           | 15–55            |
| CH50 (%)                                           | 94                       | NA           | 90–100           |
| Nitro blue tetrazolium chloride test (%)           | 100                      | NA           | 95–100           |
| Tuberculosis skin test (PPD test)                  | Negative                 | NA           | 5–10 mm          |
| Diphtheria tetanus skin test                       | 5 mm                     | NA           | 5–10 mm          |
| Allergen-specific skin prick test                  | Negative                 | NA           | Negative         |
|                                                    |                          |              | Negative cut off |
| Anti-HCV antibody (ELISA)                          | Negative                 | Negative     | <0.8 S/CO        |
| Anti-HCV immunoblot assays (Western blot and RIBA) | Negative                 | Negative     | <1               |
| Anti-HIV-1/2 IgG-Ab (EIA)                          | Negative                 | Negative     | <0.9 S/CO        |
| Anti-CMV, IgM-Ab, CMIA (AU/ml)                     | Negative                 | Negative     | <0.85 index      |
| Anti-CMV, IgG-Ab, CMIA (AU/ml)                     | <b>180.6<sup>a</sup></b> | <b>187.4</b> | <6               |
| Anti-EBV, EBNA IgG-Ab, CMIA                        | <b>14.56<sup>a</sup></b> | <b>6.33</b>  | <0.5 S/CO        |
| Anti-HSV-1, IgG-Ab                                 | <b>4.5<sup>a</sup></b>   | <b>8.1</b>   | <0.9             |
| Anti-HSV-2, IgG-Ab                                 | Negative                 | Negative     | <0.9             |
| Anti-mycoplasma pneumoniae, IgM-Ab (EIU)           | Negative                 | Negative     | <1.1 S/CO        |
| Anti-mycoplasma pneumoniae, IgG-Ab (EIU)           | <b>58<sup>a</sup></b>    | Negative     | <1.1 S/CO        |
| Anti-TBE virus, IgM-Ab                             | Negative                 | Negative     | <0.5             |
| Anti-TBE virus, IgG-Ab                             | Negative                 | Negative     | <7               |
| Anti-toxoplasma, IgM-Ab, CMIA (IU/ml)              | Negative                 | Negative     | <0.5             |
| Anti-toxoplasma, IgG-Ab, CMIA (IU/ml)              | <b>4.6<sup>a</sup></b>   | <b>1.8</b>   | <1.6             |
| Anti-VZV, IgM-Ab, EIA (mIU/ml)                     | Negative                 | Negative     | na               |
| Anti-VZV, IgG-Ab, EIA (mIU/ml)                     | <b>1,100<sup>a</sup></b> | <b>390</b>   | <50              |
| Anti-helicobacter pylori, IgG-Ab (IU/ml)           | <b>72</b>                | NA           | na               |
| Anti-helicobacter pylori, IgA-Ab (IU/ml)           | <b>4.3</b>               | NA           | na               |
|                                                    |                          |              | Reference range  |
| IgG1 (mg/dl)                                       | 402 <sup>a</sup>         | 436          | 280–800          |
| IgG2 (mg/dl)                                       | 320 <sup>a</sup>         | 447          | 115–570          |
| IgG3 (mg/dl)                                       | 17 <sup>a</sup>          | 27           | 24–125           |
| IgG4 (mg/dl)                                       | 24 <sup>a</sup>          | 91           | 5–125            |
| Antibody level before P23 (U/ml)                   | 1 <sup>a</sup>           | 2            | 1.2–2            |
| Antibody after 3 wk P23 (U/ml)                     | 16 <sup>a</sup>          | 17           | 10–18            |
| Antibody after 1 yr P23 (U/ml)                     | 16 <sup>a</sup>          | 15           | 6–20             |
| Isohemagglutinin titer (anti-B) <sup>b</sup>       | 0                        | 0            | >1/8             |
| Triiodothyronine or T3 (RIA, nmol/L)               | 1.2                      | NA           | 1.08–3.14        |
| Thyroxine or T4 (RIA, nmol/L)                      | 55                       | NA           | 70–142           |
| Free thyroxine (RIA, nmol/L)                       | 6.02                     | NA           | 4.5–14           |
| Thyroid stimulating hormone (IRMA, mIU/L)          | 0.97                     | NA           | 0.36–3.98        |
| Rheumatoid factor (IU/ml)                          | 5                        | NA           | 0–8              |
| Direct coombs                                      | Negative                 | NA           | Negative         |
| Indirect coombs                                    | Negative                 | NA           | Negative         |
| Anti-nuclear antibodies (ELISA)                    | Negative                 | NA           | Negative         |
| Fluorescent antinuclear antibody (titer)           | <1/320                   | NA           | <1/80            |
| Anti-double-strand DNA (IU/ml)                     | 4                        | NA           | 0–12             |
| Human leukocyte antigen B27                        | Negative                 | NA           | Negative         |
| Anti-cyclic citrullinated peptides (IU/ml)         | 1.1                      | NA           | 0–5              |
| Parathyroid hormone (ECL, pg/ml)                   | 26                       | NA           | 15–65            |
| 25-OH vitamin D (ECL, ng/ml)                       | 33                       | NA           | 10–53            |

Abbreviations used: CMIA, chemiluminescent microparticle assays; CO, cut off; ECL, electrochemical luminescence; EIA, enzyme immunoassay; HCV, hepatitis C virus; na, not available; NA, not analyzed; PPD, purified protein derivative; RIA, radioimmunoassay; RIBA, recombinant immunoblot assay; IRMA, immunoradiometric assay; S, signal; TBE, tick-borne encephalitis; VZV, varicella zoster virus.

<sup>a</sup>P1 is receiving IVIG therapy.

<sup>b</sup>The blood group of both P1 and P2 was A\*.

REFERENCE

Shearer, W.T., H.M. Rosenblatt, R.S. Gelman, R. Oyomopito, S. Plaeger, E.R. Stiehm, D.W. Wara, S.D. Douglas, K. Luzuriaga, E.J. McFarland, et al. Pediatric AIDS Clinical Trials Group. 2003. Lymphocyte subsets in healthy children from birth through 18 years of age: The pediatric AIDS clinical trials group P1009 study. *J. Allergy Clin. Immunol.* 112:973–980. <http://dx.doi.org/10.1016/j.jaci.2003.07.003>
